# Supplementary material for: Atomic structures of high Miller index surfaces of NiO
Source: Royal Society of Chemistry journal article supplement (doi:10.1039/d0tc04043f), 2020-01-01
Supplement: d0tc04043f1.pdf [file d0tc04043f1.pdf]

## Supplementary materials for

### Atomic structures of high Miller index surfaces of NiO

Wandong Xing, Rong Yu\*

National Center for Electron Microscopy in Beijing, School of Materials Science and Engineering, Key Laboratory of Advanced Materials of Ministry of Education of China, State Key Laboratory of New Ceramics and Fine Processing, Tsinghua

University, Beijing 100084, China

\*E-mail: [ryu@tsinghua.edu.cn](mailto:ryu@tsinghua.edu.cn)

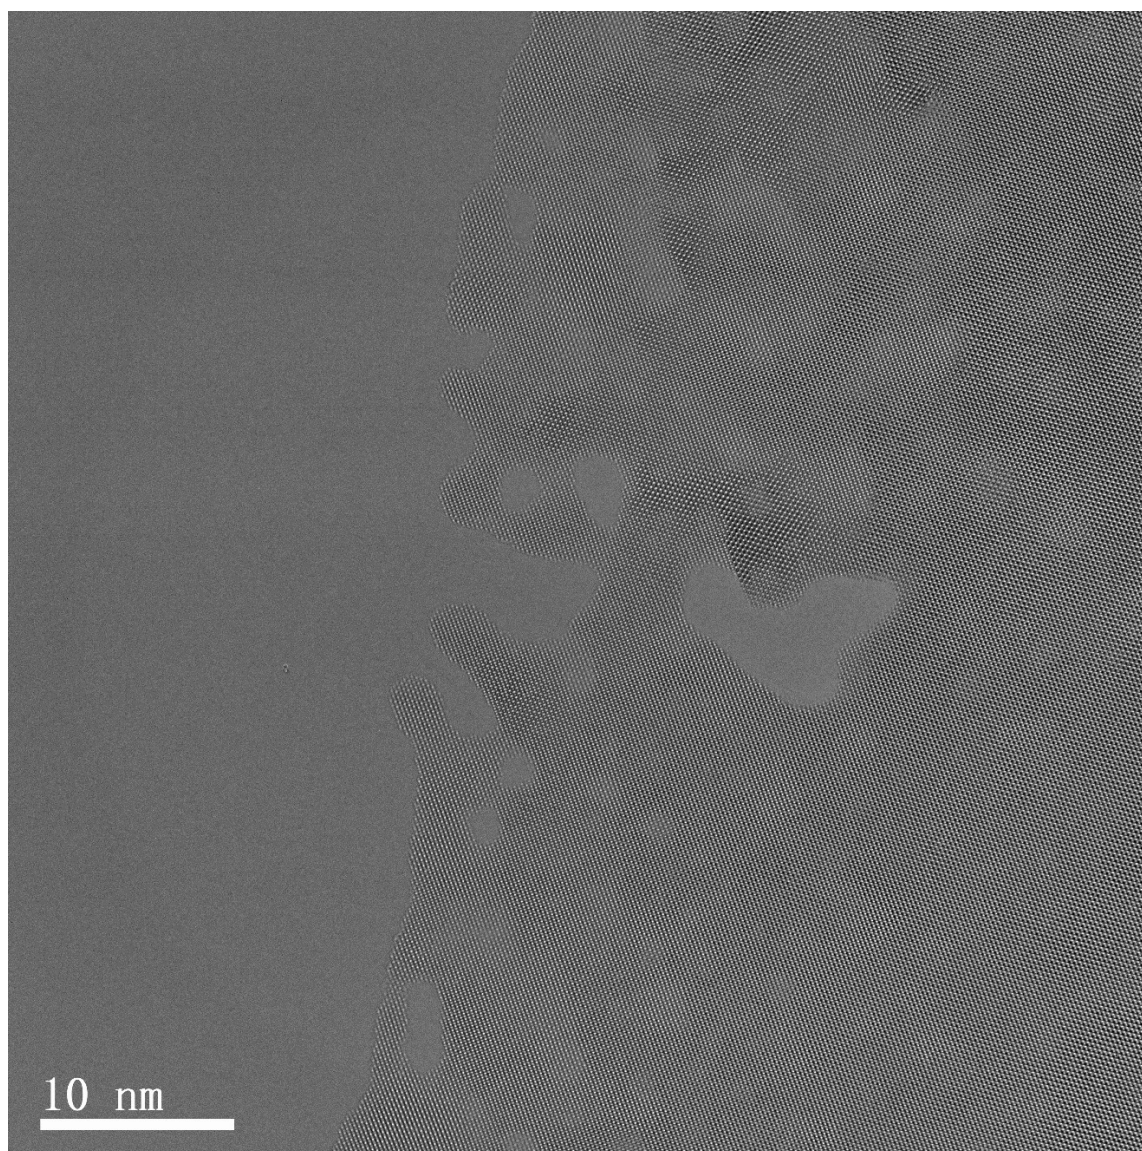

Fig. S1. The original aberration-corrected TEM images of the NiO surface, viewed along the  $[1\bar{1}0]$  zone axis.
